# Supplementary material
Source: Springer Nature journal article supplement (https://www.springermedizin.de/resource/supplementary/13002_2009_156_MOESM5_ESM.pdf/9627282)

**n=120**

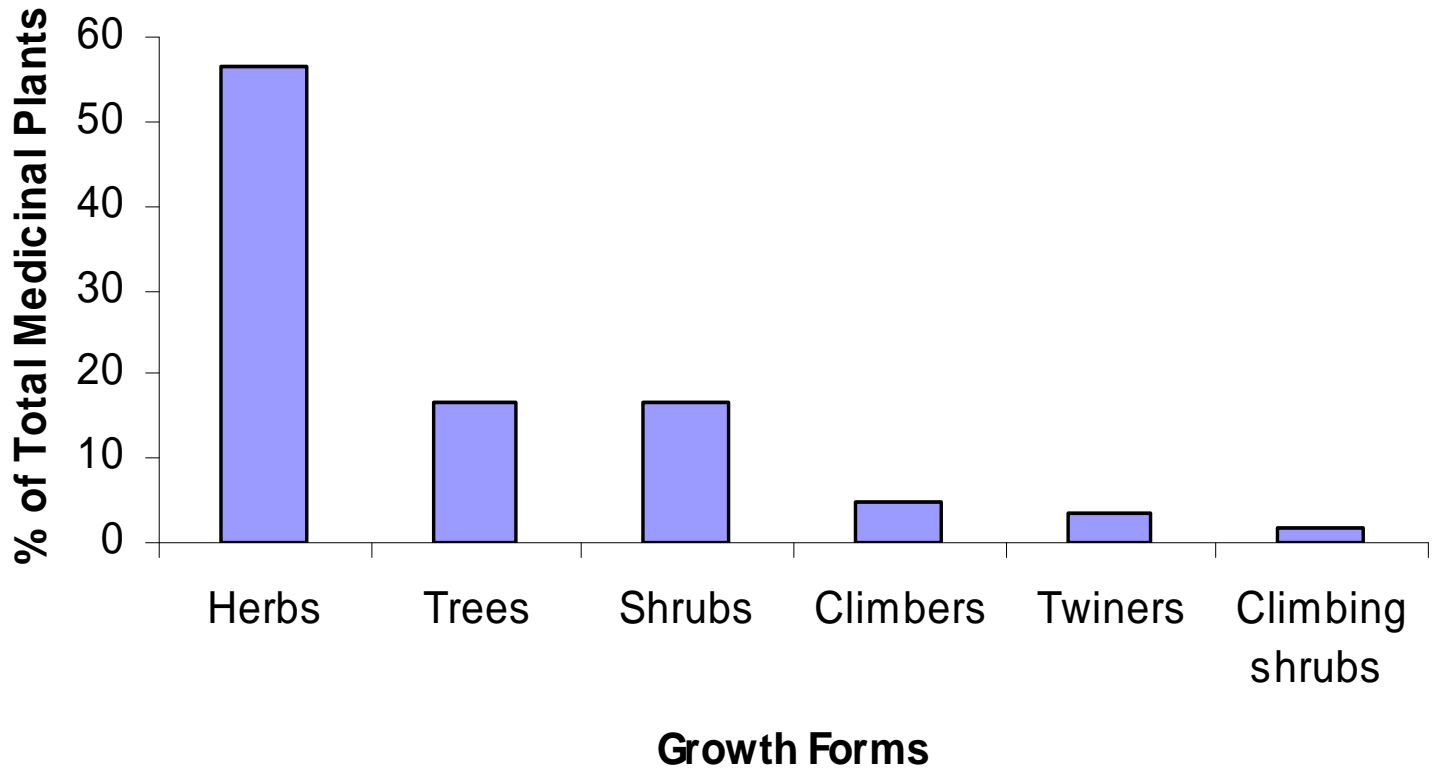

Supplement: MOESM5 [file 9627282]
